# Supplementary material
Source: publisher figshare collection journal article supplement (https://acs.figshare.com/ndownloader/files/3582273)
Supplement: Supplementary file 1 [file 3582273]

## Supporting Information (PART III)

# **Universal Solvation Model Based on Solute Electron Density and on a Continuum Model of the Solvent Defined by the Bulk Dielectric Constant and Atomic Surface Tensions**

Aleksandr V. Marenich, Christopher J. Cramer,\* and Donald G. Truhlar\*

*Department of Chemistry and Supercomputing Institute,*

*University of Minnesota, 207 Pleasant Street S.E.,*

*Minneapolis, MN 55455-0431*

Prepared for *the Journal of Physical Chemistry B*

Revised March 27, 2009

Number of pages: 4

---

\* Corresponding author e-mail: [cramer@umn.edu](mailto:cramer@umn.edu) (C.J.C) and [truhlar@umn.edu](mailto:truhlar@umn.edu) (D.G.T.)

## Functional Forms for Atomic Surface Tensions Used by SMD

The atomic surface tensions given by eq 7 in the article are described here in more detail.

For  $Z_k = \text{H}$ :

$$\sigma_k = \tilde{\sigma}_{\text{H}} + \tilde{\sigma}_{\text{HC}} \sum_{\substack{k' \\ Z_{k'}=\text{C}}}^{\text{atoms}} T(R_{kk'}, r_{\text{HC}}, \Delta r_{\text{HC}}) + \tilde{\sigma}_{\text{HO}} \sum_{\substack{k' \\ Z_{k'}=\text{O}}}^{\text{atoms}} T(R_{kk'}, r_{\text{HO}}, \Delta r_{\text{HO}})$$

For  $Z_k = \text{C}$ :

$$\sigma_k = \tilde{\sigma}_{\text{C}} + \tilde{\sigma}_{\text{CC}} \sum_{\substack{k' \\ Z_{k'}=\text{C} \\ k' \neq k}}^{\text{atoms}} T(R_{kk'}, r_{\text{CC}}, \Delta r_{\text{CC}}) + \tilde{\sigma}_{\text{CN}} \left[ \sum_{\substack{k' \\ Z_{k'}=\text{N}}}^{\text{atoms}} T(R_{kk'}, r_{\text{CN}}, \Delta r_{\text{CN}}) \right]^2$$

For  $Z_k = \text{N}$ :

$$\sigma_k = \tilde{\sigma}_{\text{N}} + \tilde{\sigma}_{\text{NC}} \left\{ \sum_{\substack{k' \\ Z_{k'}=\text{C}}}^{\text{atoms}} T(R_{kk'}, r_{\text{NC}}, \Delta r_{\text{NC}}) \left[ \sum_{\substack{k'' \\ k'' \neq k' \\ k'' \neq k}}^{\text{atoms}} T(R_{k'k''}, r_{\text{C}Z_{k''}}, \Delta r_{\text{C}Z_{k''}}) \right]^2 \right\}^{1.3} + \tilde{\sigma}_{\text{NC}(3)} \sum_{\substack{k' \\ Z_{k'}=\text{C}}}^{\text{atoms}} T(R_{kk'}, r_{\text{NC}(3)}, \Delta r_{\text{NC}(3)})$$

For  $Z_k = \text{O}$ :

$$\sigma_k = \tilde{\sigma}_{\text{O}} + \tilde{\sigma}_{\text{OC}} \sum_{\substack{k' \\ Z_{k'}=\text{C}}}^{\text{atoms}} T(R_{kk'}, r_{\text{OC}}, \Delta r_{\text{OC}}) + \tilde{\sigma}_{\text{ON}} \sum_{\substack{k' \\ Z_{k'}=\text{N}}}^{\text{atoms}} T(R_{kk'}, r_{\text{ON}}, \Delta r_{\text{ON}}) + \tilde{\sigma}_{\text{OO}} \sum_{\substack{k' \\ Z_{k'}=\text{O} \\ k' \neq k}}^{\text{atoms}} T(R_{kk'}, r_{\text{OO}}, \Delta r_{\text{OO}}) + \tilde{\sigma}_{\text{OP}} \sum_{\substack{k' \\ Z_{k'}=\text{P}}}^{\text{atoms}} T(R_{kk'}, r_{\text{OP}}, \Delta r_{\text{OP}})$$

For  $Z_k = \text{F, Si, S, Cl, and Br}$ :

$$\sigma_k = \tilde{\sigma}_{Z_k}$$

For  $Z_k \neq \text{H, C, N, O, F, Si, S, Cl, or Br}$ :

$$\sigma_k = 0$$

In the equations above,  $k$  runs over all atoms in a molecule,  $Z_k$  is the atomic symbol of atom  $k$ ,  $\sigma_k$  is the atomic surface tension of atom  $k$ ,  $\tilde{\sigma}_{Z_k}$  is an atomic-number-specific parameter,  $\tilde{\sigma}_{Z_k Z_{k'}}$  is a parameter that depends on the atomic numbers of atoms  $k$  and  $k'$ ,  $T(R_{kk'}, r_{Z_k Z_{k'}}, \Delta r_{Z_k Z_{k'}})$  is a geometry-dependent switching function called a cutoff tanh. This function is described as follows

$$T(R_{kk'}, r_{Z_k Z_{k'}}, \Delta r_{Z_k Z_{k'}}) = \begin{cases} \exp\left(\frac{\Delta r_{Z_k Z_{k'}}}{R_{kk'} - \Delta r_{Z_k Z_{k'}} - r_{Z_k Z_{k'}}}\right) & \text{if } R_{kk'} < r_{Z_k Z_{k'}} + \Delta r_{Z_k Z_{k'}} \\ 0 & \text{otherwise} \end{cases}$$

where  $R_{kk'}$  is the interatomic distance between atoms  $k$  and  $k'$  and  $r_{Z_k Z_{k'}}$  and  $\Delta r_{Z_k Z_{k'}}$  are atomic-number-specific parameters described in Table.

**Table.** Values of  $r_{ZZ'}$  and  $\Delta r_{ZZ'}$  (Å) <sup>a</sup>

| $Z, Z'$ | $r_{ZZ'}$ | $\Delta r_{ZZ'}$ |
|---------|-----------|------------------|
| H, C    | 1.55      | 0.3              |
| H, O    | 1.55      | 0.3              |
| C, H    | 1.55      | 0.3              |
| C, C    | 1.84      | 0.3              |
| C, N    | 1.84      | 0.3              |
| C, O    | 1.84      | 0.3              |
| C, F    | 1.84      | 0.3              |
| C, P    | 2.2       | 0.3              |
| C, S    | 2.2       | 0.3              |
| C, Cl   | 2.1       | 0.3              |
| C, Br   | 2.3       | 0.3              |
| C, I    | 2.6       | 0.3              |
| N, C    | 1.84      | 0.3              |
| N, C(3) | 1.225     | 0.065            |
| O, C    | 1.33      | 0.1              |
| O, N    | 1.5       | 0.3              |
| O, O    | 1.8       | 0.3              |
| O, P    | 2.1       | 0.3              |

<sup>a</sup> Any possible  $r_{ZZ'}$  or  $\Delta r_{ZZ'}$  that is not in the table is set equal to zero in the SMD model.
